# Supplementary material
Source: PubMed Central journal article supplement (PMC4842105)
Supplement: NIHMS751541-supplement-supplement_1.pdf [file NIHMS751541-supplement-supplement_1.pdf]

## **Supplementary Materials and Methods**

### **Cell Culture and materials**

Hep3B and HepG2 cell lines were grown in DMEM high glucose supplemented with 10% FBS and 50 mg/ml of a Pen/Strep mix in a 37°C/5% CO<sub>2</sub> humidified incubator. Mevalonate and lanosterol were from Sigma-Aldrich (St. Louis, MO). The primary antibodies used include those against TM6SF2 (sc-169600), GAPDH (sc-25778), ABCG5 (sc-25796) and ABCG8 (sc-30111) from Santa Cruz Biotechnology (Dallas, Texas). ER stress antibody sampler kit (#9956) from Cell Signaling Technology (Danvers, MA). Purified anti-XBP-1 (619501) was from BioLegend (San Diego, CA).

### **Protein Extraction and Western Blotting**

Tissue extracts were prepared with tissue extraction reagents (Thermo Fisher Scientific, Grand Island, NY). Protein extracts were resolved by SDS-PAGE using 10% gels and electro blotted onto PVDF membranes (Bio-Rad). Membranes were blocked for 1 h at room temperature in TBS Tween 20 containing 5% (w/v) nonfat dry milk powder, and incubated overnight with primary antibodies diluted 1:500–1000 in 5% nonfat milk solution. After washing, membranes were incubated with IRDye-conjugated IgG (LI-COR Biosciences, Lincoln, NE) secondary antibody diluted 1:5000 for 1 h. After washing with TBST, blots were scanned, and the image was displayed in grayscale. The intensity of the protein band was quantified using an image processing program (Li-Cor Odyssey).

### **Quantitative Real-Time Reverse Transcription Polymerase Chain Reaction**

Total RNA from mouse liver samples was extracted using TRIzol® reagent (Invitrogen, Grand Island, NY) according to the manufacturer's instructions. Total RNA from cultured mammalian cells was extracted using the RNeasy kit (Qiagen, Valencia, CA). RNA was reverse-transcribed into cDNA with SuperScript III and random primers (Invitrogen). Specific transcript levels were assessed by a real-time PCR system (Bio-Rad, Hercules, CA) using iQ SYBR Green Supermix (Bio-Rad). Unless indicated otherwise, the relative quantification for each gene of interest was normalized against the internal control, Gapdh. The primers used in this study are listed in Supplementary Table 1.

### **Histology**

Liver slides were stained with Picrosirius Red (PSR) stain kit (PolyScience, #24901, Warrington, PA) according to the manufacturer's instructions. Computer-assisted quantification of liver fibrosis in PSR stained sections was performed using a customized Image J macro. The mouse tissues were routinely counter stained with haematoxylin and eosin (H&E) staining as described previously.<sup>1</sup> Inflammation status was evaluated in the H&E-stained sections. For inflammation score, 0 was defined as no inflammatory foci, 1 was defined as <2 foci per 200 x field, 2 was defined as 2-4 foci per 200 x field, 3 was defined as >4 foci per 200 x field.<sup>2,3</sup>

### **Oil Red O (ORO) Staining**

Mouse livers were fixed with 4% paraformaldehyde and then impregnated with 30% sucrose until they sank. Frozen liver sections (8  $\mu$ m) were stained with 5% Oil Red O (Sigma-Aldrich, St. Louis, MO) for 15 min and then stained with haematoxylin. Sections were then examined under light microscopy. A total of 6 tissue sections were analyzed for each animal.

### **Detection of Total Cholesterol (TC)**

TC in the liver was determined with a TC assay kit (Cell Biolabs, STA-384, San Diego, CA) following the manufacturer's recommendation. In brief, the liver cholesterol was extracted with a mixture of chloroform: isopropanol: NP-40 (7:11:0.1) in a micro-homogenizer. Each cholesterol standard and sample was assayed in duplicate or triplicate. After the cholesterol reaction was completed, the plate was read with a spectrophotometric microplate reader in the 540-570 nm range. The concentration of cholesterol was calculated by comparing the sample absorbance values to the standard curve and normalized to the liver sample weight.

### **Intracellular Cholesterol Detection**

The intracellular cholesterol in HepG2 cells was detected based on the intensity of Filipin III fluorescence with a kit from Cayman Chemical Company (10009779) according to the manufacturer's instructions.

### **Detection of liver Triglyceride (TG)**

TG in the liver was determined with a TG assay kit (BioVision, K622-100, Milpitas, CA) following the manufacturer's recommendation. In brief, the liver TG was extracted with solution containing 5% NP-40 in water. Each TG standard and sample was assayed in duplicate or triplicate. After the cholesterol reaction was completed, the plate was read with a spectrophotometric microplate reader at 570 nm. The concentration of TG was calculated by comparing the sample absorbance values to the standard curve and normalized to the liver sample weight.

### **Alanine Aminotransferase (ALT) and Aspartate Aminotransferase (AST) Activity Assay**

The ALT and AST enzyme activity in mouse serum was determined with an ALT assay kit (Sigma-Aldrich, MAK052) and AST assay kit (Sigma-Aldrich, MAK055, St. Louis, MO), respectively, according to the manufacturer's instructions.

### **References:**

1. Chang L, Villacorta L, Li R, et al. Loss of perivascular adipose tissue on peroxisome proliferator-activated receptor-gamma deletion in smooth muscle cells impairs intravascular thermoregulation and enhances atherosclerosis. *Circulation* 2012;126:1067-78.
2. Brunt EM, Tiniakos DG. Histopathology of nonalcoholic fatty liver disease. *World J Gastroenterol* 2010;16:5286-96.
3. Kleiner DE, Brunt EM, Van Natta M, et al. Design and validation of a histological scoring system for nonalcoholic fatty liver disease. *Hepatology* 2005;41:1313-21.

**Supplementary Table 1**

**Primers for Real-time PCR and Genotyping**

| <b>Gene*</b>             | <b>Forward (5'-3')</b> | <b>Reverse (5'-3')</b> |
|--------------------------|------------------------|------------------------|
| mTm6sf2                  | caagtttcggcgttctcaca   | tgaagcccatcatgtagcca   |
| mCd36,                   | gaatgggctgtgatcggaac   | acgtcatctgggttttcac    |
| mCyp7a1                  | cacttggtcaagaccgcaca   | gtgtttgcttgagatgcccc   |
| mCyp8b1                  | gtacgcttcctctatcgct    | ctggaggggatggcgtcttat  |
| mCyp2c54                 | atggggatgtctttgctgga   | tcctctgaacacggctctc    |
| mCyp27a1                 | cttcatcgcaaggagagc     | ccaaggcaaggtagtagaga   |
| mAbcg5                   | cagtatagtggccctgctca   | ccacaagtgaagttcaggcc   |
| mAbcg8                   | cacctccacatgtcctct     | ttcagggtccatggcactgat  |
| mGapdh                   | ctgcgactcaacagcaact    | gagttgggataggcctctc    |
| mMcp-1                   | aggtccctgtcatgtctctg   | tctggacccattccttctg    |
| mAcat2-1                 | ccaccacctggacagtct     | agcccttgatgactgattgg   |
| mDhcr7-1                 | cgctcccaaagtcaagagtc   | gtgtcttgcccaaagtgtct   |
| mDhcr24-1                | cactcagctgctatgggaca   | agggattcatgccttctcct   |
| mHmgcr-1                 | tggagatcatgtgctgcttc   | gcgactatgagcgtgaacaa   |
| mHmgcs1-1                | tttgatgcagctgtttgagg   | ccacctgtaggctctggcatt  |
| mLss-1                   | gctgcatgtggtgtatggac   | gagaaacgtgctcctggaag   |
| mPmvk-1                  | gaagattgtggaaggcgtgt   | tctgactcagcatcgctccac  |
| mSc5d-1                  | atgcttttcaccctgtggac   | gtgggtggtctgtgtggtgag  |
| TM6SF2<br>transgene      | ttctacaccaaggagggtgagc | aacaccaggatgctcatggcga |
| Alb-TM6SF2<br>genotyping | gaaccaatgaaatgcgaggt   | agaagccagcaaggatgaga   |
| Tm6sf2 KO<br>genotyping  | ctgaaaactgggaaaggacgct | tggagagggatttctgcttgca |

\* “m” denotes mouse.

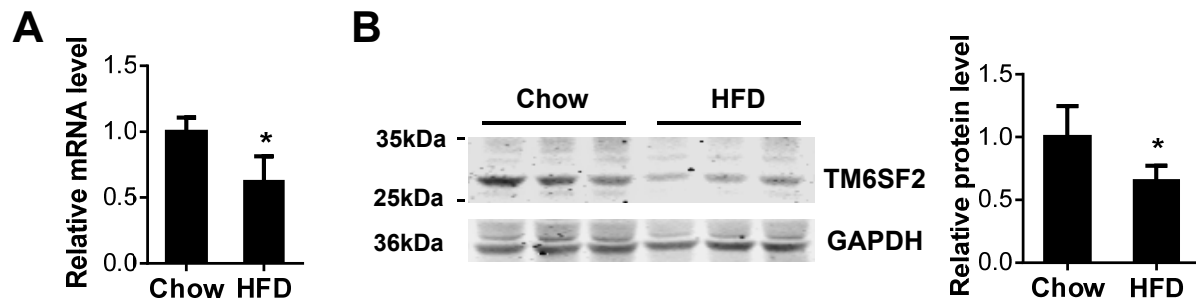

**Supplementary Figure 1. TM6SF2 is downregulated in livers of HFD-fed mice.** (A), C57BL/6 mice were fed a chow diet or high fat diet (HFD) for 10 weeks, and the expression of TM6SF2 in livers was determined by Real-time PCR,  $n = 5$  per group. (B), The expression of TM6SF2 was determined by Western blot. The band intensity was quantitatively analyzed and normalized to GAPDH. Values are mean  $\pm$  SD. \*,  $P < .05$ .

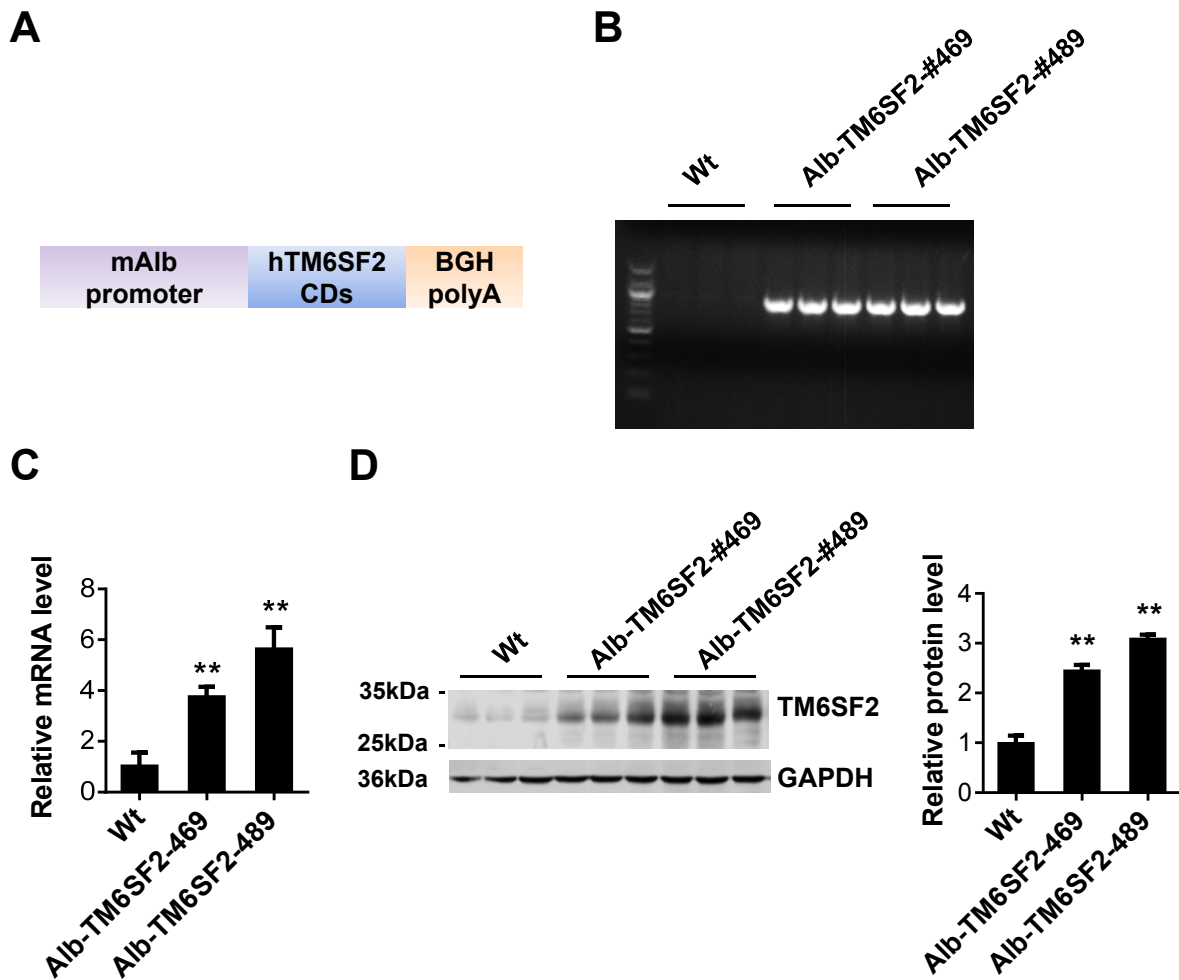

**Supplementary Figure 2. Genotyping of TM6SF2 transgenic mice.** (A), Schema for the generation of mouse albumin (mAlb) promoter-driven human TM6SF2 transgenic mice. (B), Genotyping of Alb-TM6SF2 transgenic mice. (C), The expression of TM6SF2 in livers of the wild type (Wt) and Alb-TM6SF2 transgenic mice was determined by Real-time PCR (n = 4-5 per group). (D), The expression of TM6SF2 was detected by Western blot and the band intensity was quantitatively analyzed and normalized to GAPDH. Values are mean  $\pm$  SD. \*,  $P < .05$ ; \*\*,  $P < .01$ .

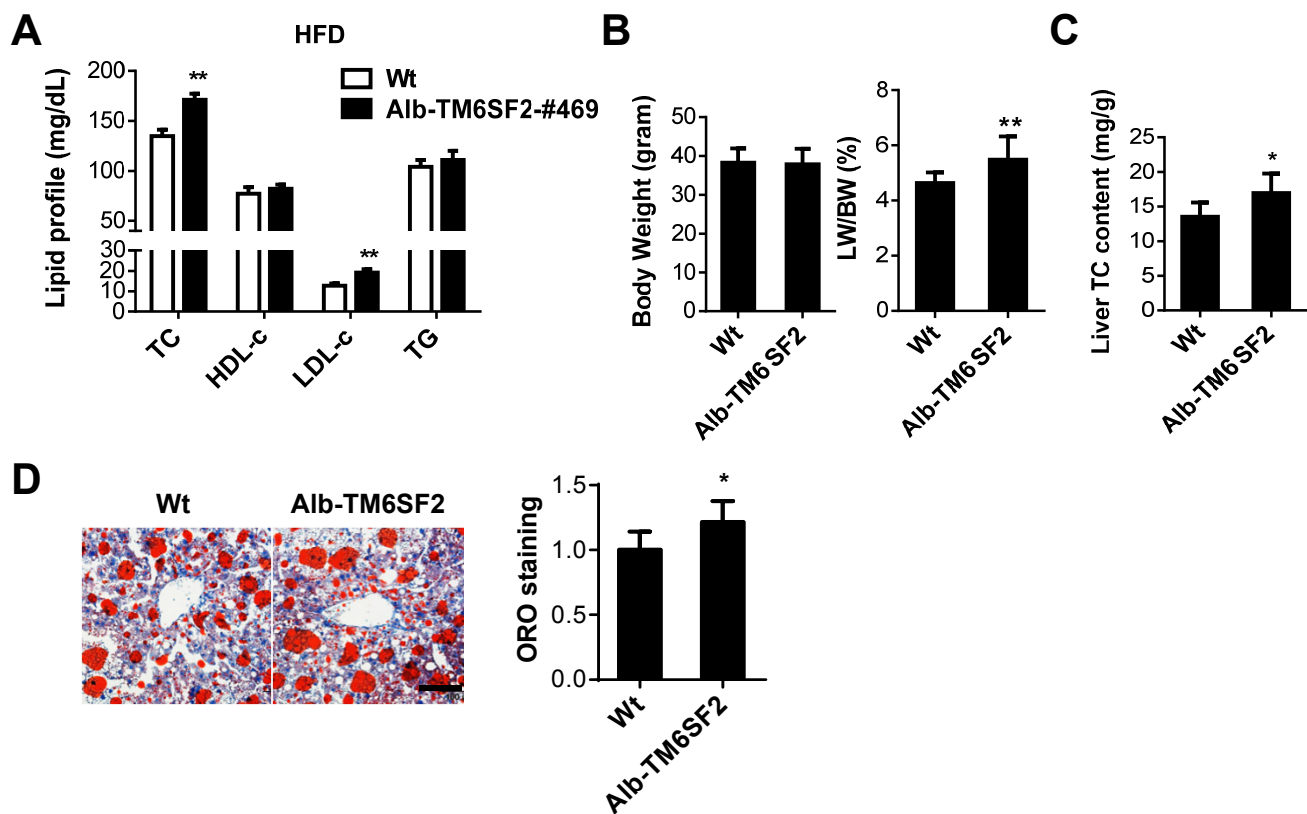

**Supplementary Figure 3. Lipid profile in Alb-TM6SF2 transgenic mice.** A second line (#469) of Alb-TM6SF2 transgenic mice fed a HFD for 10 weeks. (A), Lipid profile was measured enzymatically. (B), The BW and LW/BW was determined. (C), TC in the liver was extracted and detected. (D), Sections from the liver tissue of the same mice were stained with ORO and quantitatively analyzed. Scale bar=100  $\mu$ m. N= 7-8 per group. Values are mean  $\pm$  SD. \*,  $P < .05$ ; \*\*,  $P < .01$ .

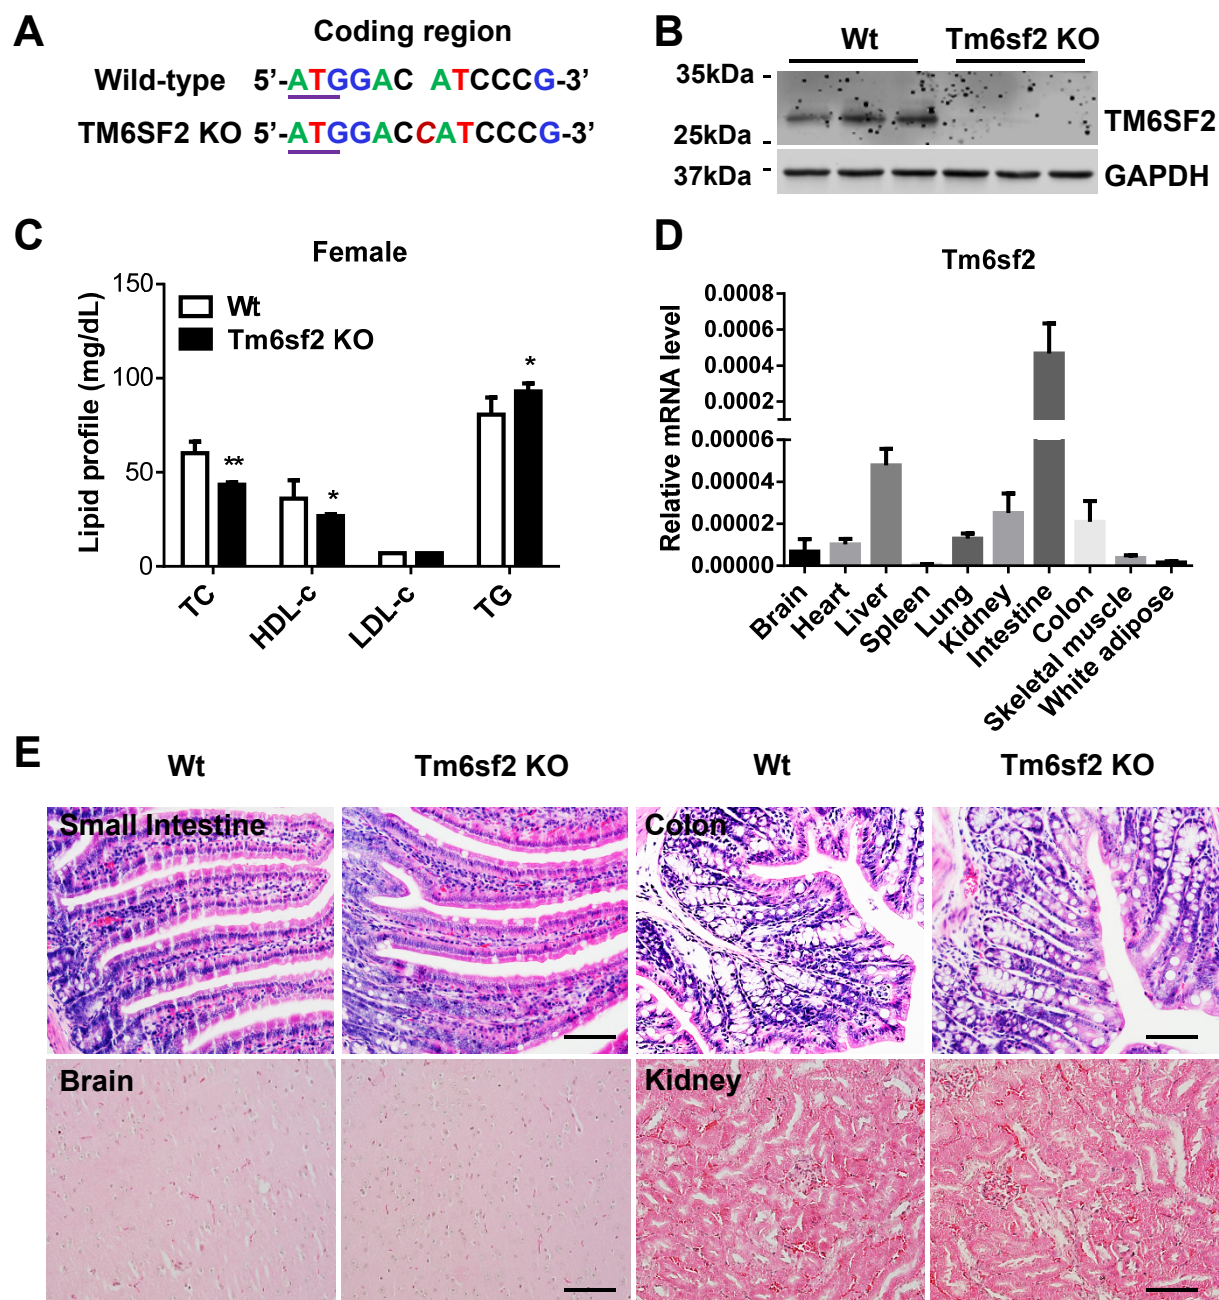

**Supplementary Figure 4. Characterization of Tm6sf2 KO mice fed a chow diet.** (A), Generation of Tm6sf2 KO mice by CRISPR/Cas9 technology. (B), The Tm6sf2 KO was confirmed by Western blot. (C), Eight-week-old female Tm6sf2 KO mice and control mice were fed a chow diet ( $n = 8$  per group). The plasma levels of cholesterol and TG in the mice were determined enzymatically. Values are mean  $\pm$  SD. \*,  $P < .05$ ; \*\*,  $P < .01$ . (D), Tissue distribution of Tm6sf2 in mouse was determined by Real-time PCR with 18S as the internal control. (E), Histological analysis of tissues from male Tm6sf2 KO mice and wild-type mice fed a chow diet by H&E staining. Scale bar= 100  $\mu$ m.

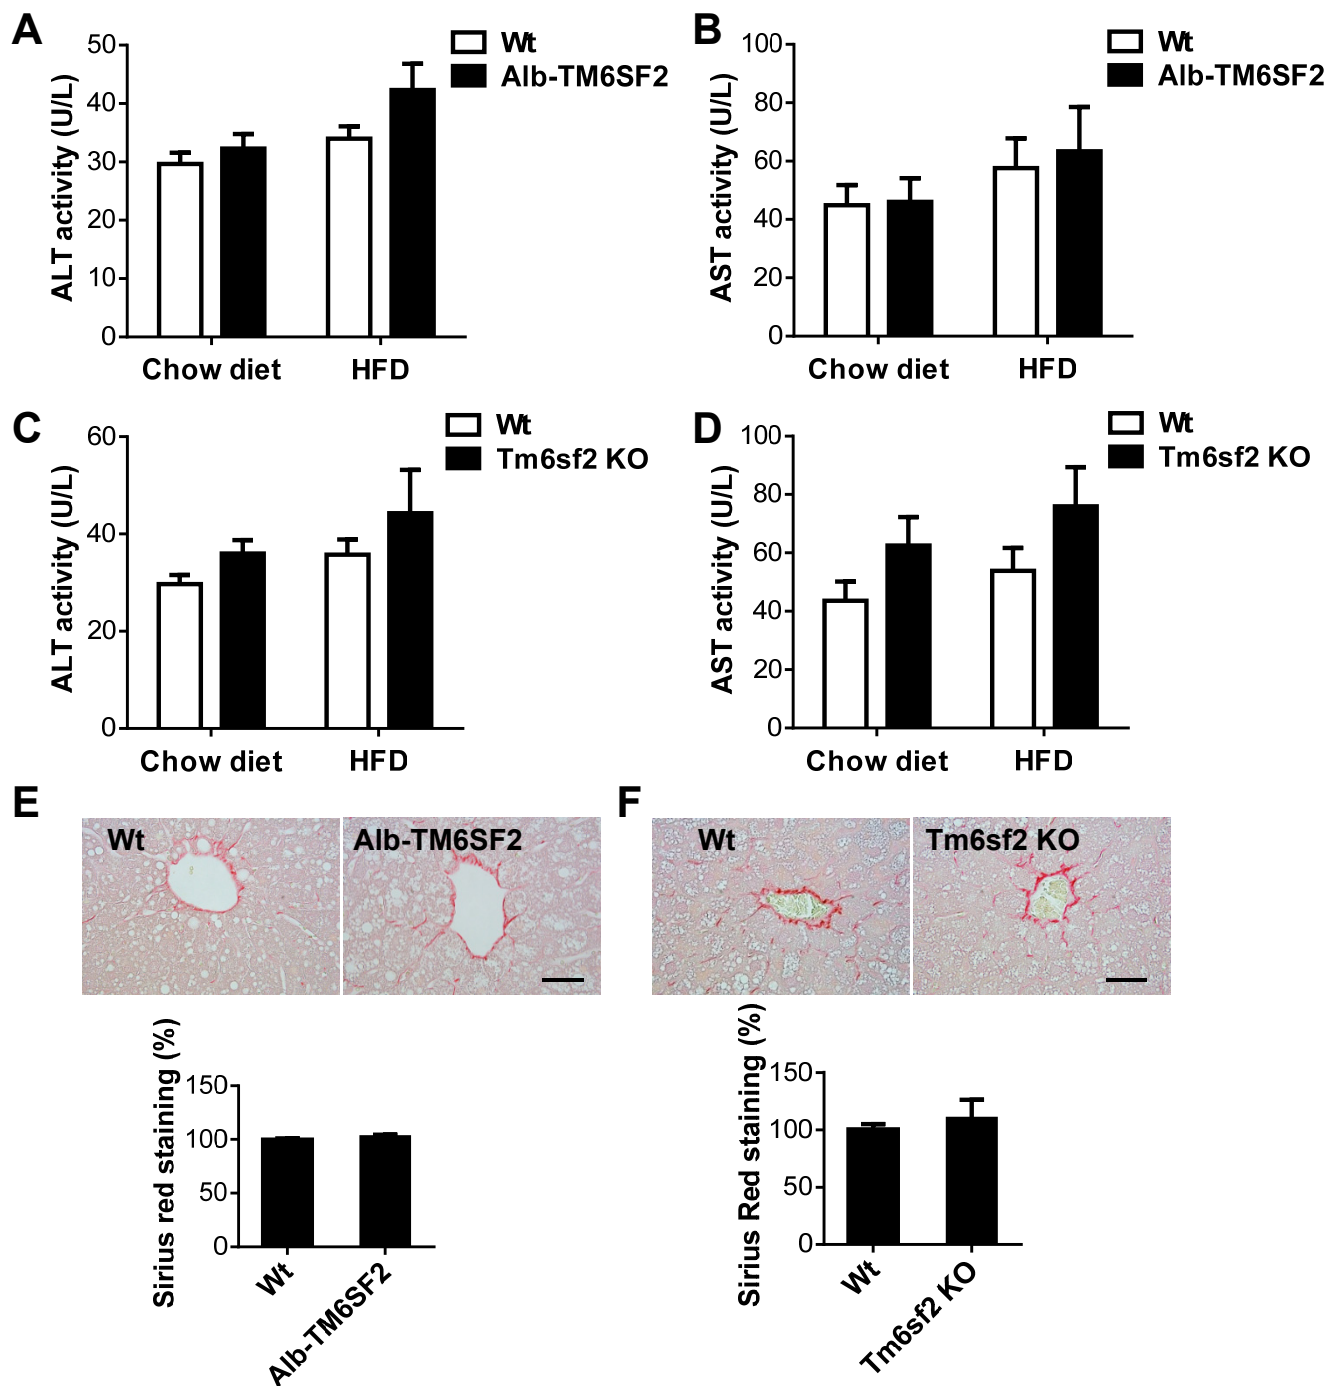

**Supplementary Figure 5. Fibrosis in Tm6sf2 genetically engineered mice.** (A-B), Eight-week-old Alb-TM6SF2-#489 and control mice were fed a chow diet or HFD for 10 weeks ( $n = 5-7$  per group). The plasma ALT (A) and AST activity (B) were determined enzymatically in the mice. (C-D), Eight-week-old Tm6sf2 KO mice and control mice were fed a chow diet or HFD for 12 weeks ( $n = 5-7$  per group). The plasma ALT (C) activity and AST activity (D) were determined enzymatically in the mice. Values in A-D are mean  $\pm$  SEM. (E), The liver fibrosis in Alb-TM6SF2 mice and control mice fed a HFD was measured by picrosirius red staining and quantitatively analyzed. (F), The liver fibrosis in Tm6sf2 KO and control mice fed a HFD was measured by picrosirius red staining and quantitatively analyzed ( $n = 5-7$  per group). Values are mean  $\pm$  SD. Scale bar = 50  $\mu$ m in (E) and (F).

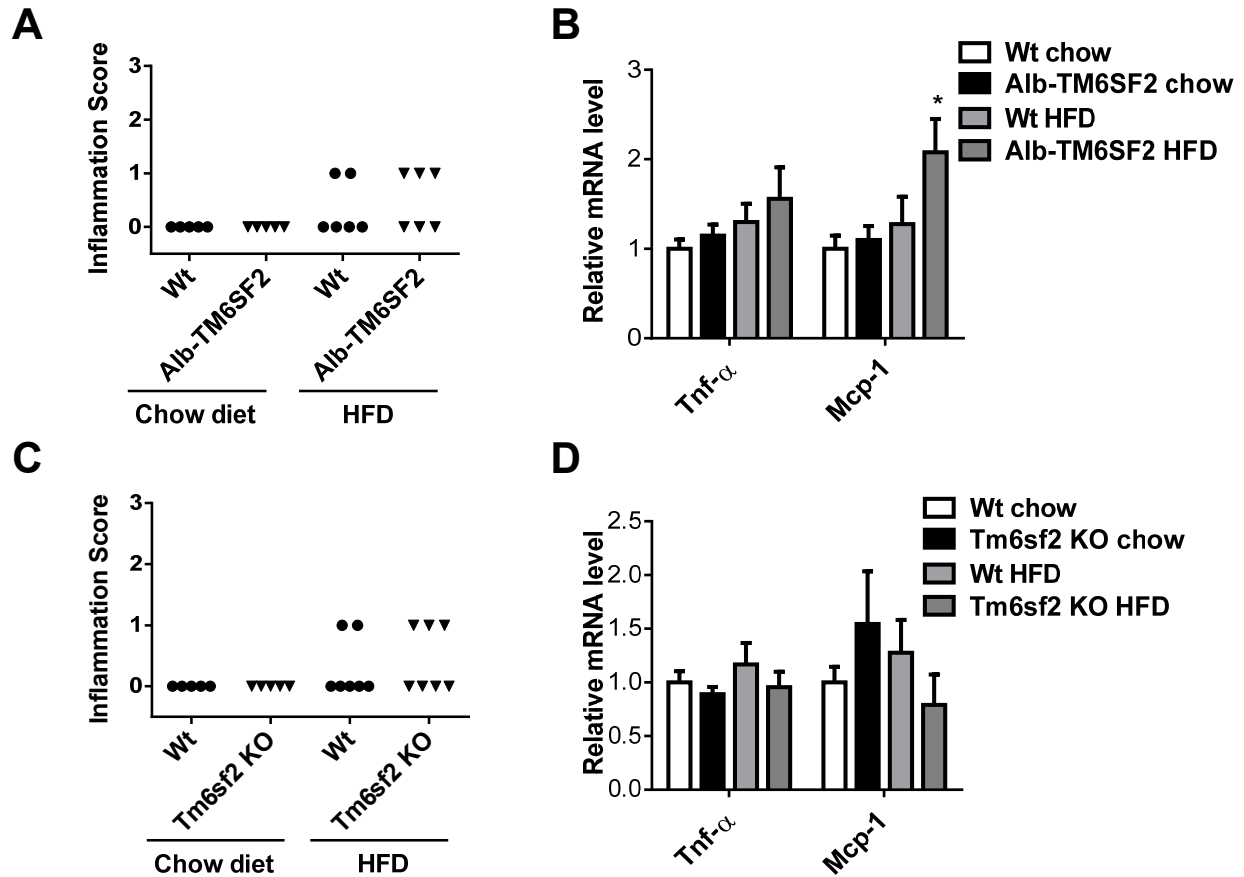

**Supplementary Figure 6. The effect of TM6SF2 on inflammatory genes in the liver.** (A-B), Eight-week-old Alb-TM6SF2-#489 and control mice were fed a chow diet or HFD for 10 weeks. (A), The inflammation score was assigned in a blinded fashion to H&E-stained samples for inflammation, N = 5-6. (B), The expression of Tnf- $\alpha$  and Mcp-1 was determined by Real-time PCR. (C-D), Eight-week-old Tm6sf2 KO and control mice were fed a chow diet or HFD for 12 weeks. (C), The inflammation score was assessed as described in B. N = 5-7. (D), The expression of Tnf- $\alpha$  and Mcp-1 was determined by Real-time PCR. Values are mean  $\pm$  SD. \*,  $P < .05$ .

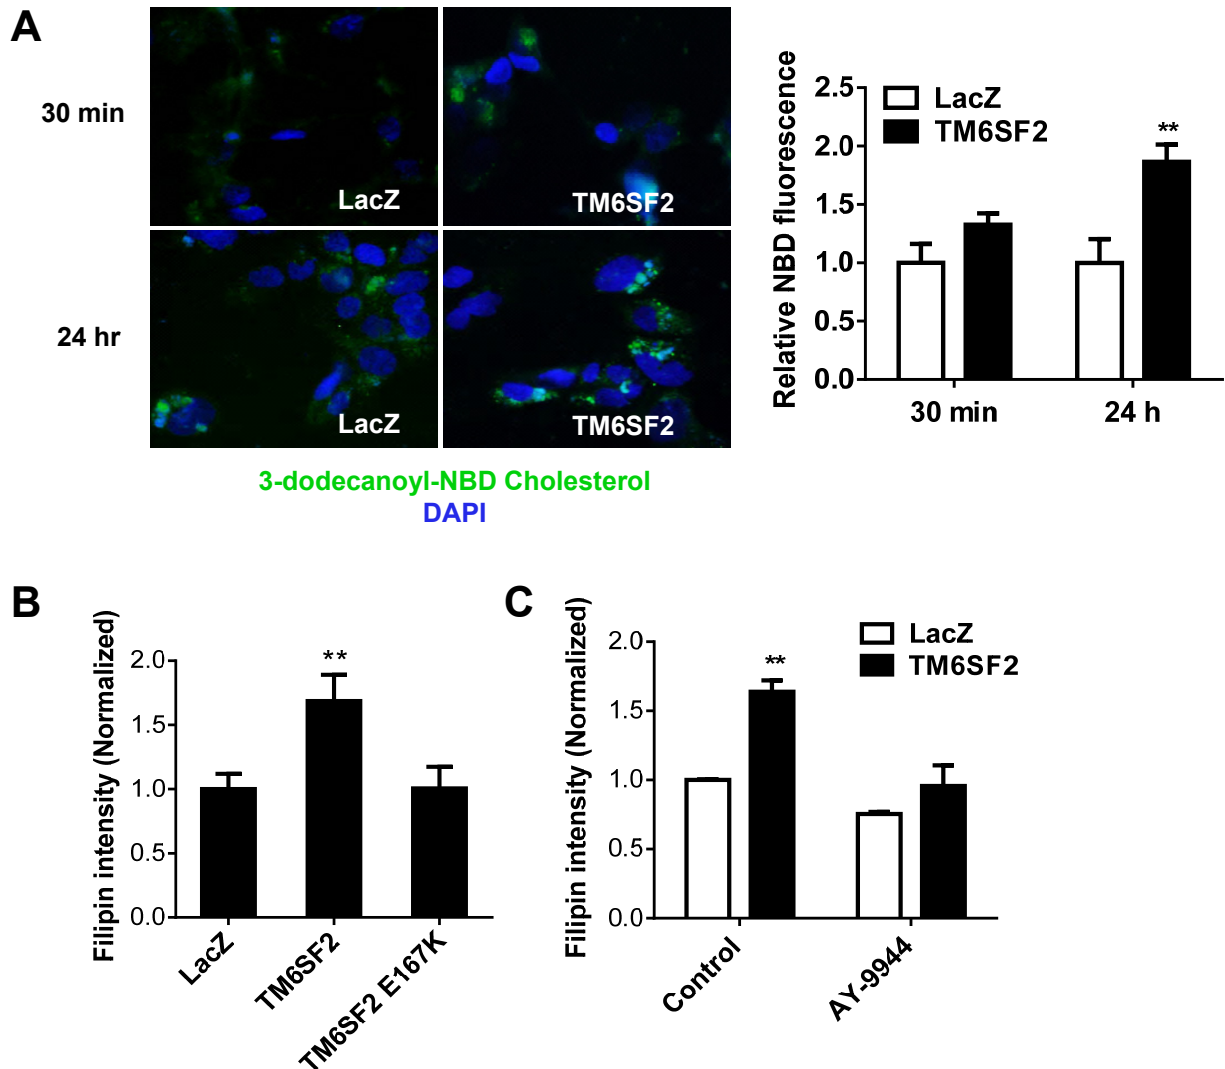

**Supplementary Figure 7. The effect of TM6SF2 on cholesterol biosynthesis.** (A), Hep3B cells were incubated with 3-dodecanoyl-NBD Cholesterol (15  $\mu\text{g/mL}$ ) in serum-free medium for 30 min, or 3-dodecanoyl-NBD Cholesterol (1.5  $\mu\text{g/mL}$ ) in serum-free medium for 24 h. The intracellular NBD-cholesterol was detected by immunofluorescence, and the fluorescence intensity was quantitatively analyzed by NIH ImageJ. Scale bar = 50  $\mu\text{m}$ . (B), HepG2 cells were infected with Ad-TM6SF2, Ad-TM6SF2-E167K, or Ad-LacZ (20 MOI) and 48 h later, treated with hydroxypropyl- $\beta$ -cyclodextrin (HPCD, 1% w/v) for 1 h, and then incubated with lanosterol (10  $\mu\text{mol/L}$ ) plus mevalonate (50  $\mu\text{mol/L}$ ) in 5% lipoprotein deficient serum (LPDS) DMEM for 24 h. (C), HepG2 cells were infected with Ad-TM6SF2 or Ad-LacZ (20 MOI) and 24 h later, pretreated with AY-9944 after cholesterol depletion by HPCD, and then incubated with lanosterol (10  $\mu\text{mol/L}$ ) in 5% LPDS DMEM for 24 h. The intracellular cholesterol was detected based on the intensity of Filipin III fluorescence. Values are mean  $\pm$  SD. \*\*,  $P < .01$ .

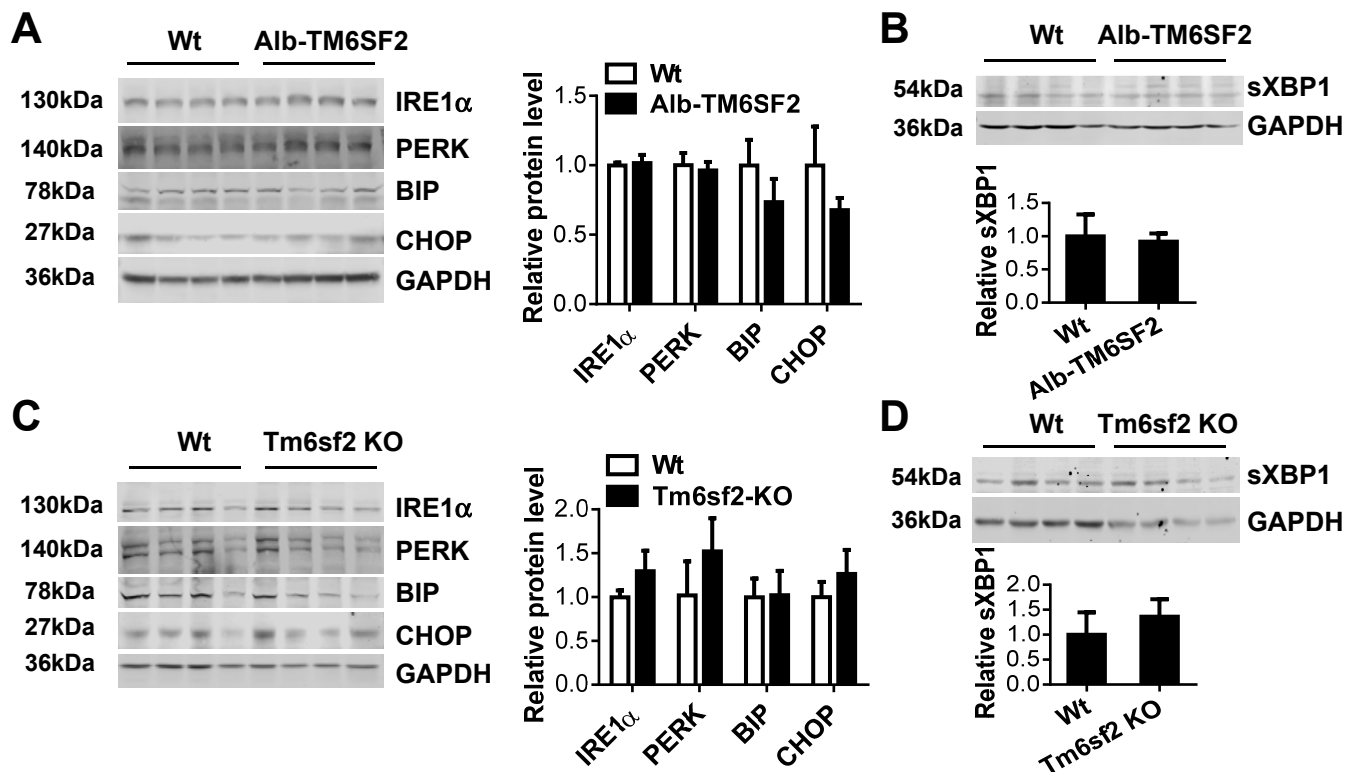

**Supplementary Figure 8. The effect of TM6SF2 on ER stress pathway.** (A-B), Eight-week-old Alb-TM6SF2-#489 and control mice were fed a HFD for 10 weeks. The expression of ER stress proteins (A) and spliced XBP1 (sXBP1) (B) was determined by Western blot and quantitatively analyzed. (C-D), Eight-week-old Tm6sf2 KO mice and control mice were fed a HFD for 12 weeks. The expression of ER stress genes (C) and sXBP1 (D) was determined by Western blot and quantitatively analyzed. N= 4-5 per group. Values are mean  $\pm$  SD.
